# Supplementary material for: Elucidating the role of cGAS in pan-cancer using integrated bioinformatics and experimental approaches
Source: Research Square preprint supplement (doi:10.21203/rs.3.rs-4488074/v1), 2024-07-18
Supplement: Supplementary file 1 [file 17ecd5acfe0b91a2d3615bf6.xlsx]

## Sheet: supplementary table 1
Supplementary table 1. The number of normal and tumor samples in various cancer types from TCGA.
ID	Tumor Type	No. Normal Sample	No. Tumor Sample	Total
BLCA	Bladder Urothelial Carcinoma	19	411	430
BRCA	Breast Invasive Carcinoma	113	1104	1217
CESC	Cervical Squamous Cell Carcinoma	3	306	309
CRC	Colon and Rectum Adenocarcinoma	51	638	689
ESCA	Esophageal Carcinoma	11	162	173
GBM	Glioblastoma Multiforme	5	168	173
HNSC	Head and Neck Squamous Cell Carcinoma	44	502	546
KIRC	Kidney Renal Clear Cell Carcinoma	72	535	607
KIRP	Kidney Renal Papillary Cell Carcinoma	32	289	321
LGG	Brain Lower Grade Glioma	0	529	529
LIHC	Liver Hepatocellular Carcinoma	50	374	424
LUAD	Lung Adenocarcinoma	59	526	585
LUSC	Lung Squamous Cell Carcinoma	49	501	550
OV	Ovarian Serous Cystadenocarcinoma	0	379	379
PAAD	Pancreatic Adenocarcinoma	4	178	182
PRAD	Prostate Adenocarcinoma	52	499	551
SKCM	Skin Cutaneous Melanoma	1	471	472
STAD	Stomach Adenocarcinoma	32	375	407
THCA	Thyroid Carcinoma and Thymoma	60	629	689
UCEC	Uterine Corpus Endometrial Carcinoma	35	548	583

## Sheet: supplementary table 2
﻿Supplementary table 2. qPCR Primers
human GAPDH	﻿Forward	AGGGGAGATTCAGTGTGGTG
	﻿Reverse	GGCCTCCAAGGAGTAAGACC
human cGAS	﻿Forward	TGTTTTGTGATGGACTCTTTTTC
	﻿Reverse	CGTGCTCATAGTAGCTCCCGGTG
human IFNβ	﻿Forward	GCTTGGATTCCTACAAAGAAGCA
	﻿Reverse	ATAGATGGTCAATGCGGCGTC
human CHK1	﻿Forward	TGCGTTGTAAGATTTATTTTGGCTC
	﻿Reverse	AGTTTCCCGGAGAAAGCGAG
human rad51	﻿Forward	GTGGAGCTAATGGCAATGCAG
	﻿Reverse	TTAGCTCCTTCTTTGGCGCA

## Sheet: supplementary table 3
﻿Supplementary table 3. The methylation levels of CGAS promoter in different types of solid tumors and normal tissues.
Cancer	Cancer N	Normal N	Cancer Q2	Normal Q2	P value
BLCA	416	21	0.05	0.068	0.670164
LGG	534	1	0.5843	0	nan
BRCA	794	96	0.0509	0.0643	0.237761
CESC	309	3	0.0497	0.1766	1.23611e-05	***
COAD	309	38	0.074	0.092	0.00317395	**
ESCA	186	16	0.0512	0.0573	0.648112
GBM	153	2	0.2953	0.252	0.677473
HNSC	530	50	0.0488	0.057	0.565042
KICH	66	1	0.2013	0	nan
KIRC	323	160	0.055	0.2015	2.10481e-07	***
KIRP	276	45	0.0718	0.2337	0.00138992	**
LIHC	380	50	0.3832	0.2644	0.00520533	**
LUAD	471	32	0.08	0.0957	0.689808
LUSC	370	42	0.0516	0.0508	0.000212565	***
OV	10	1	0.0729	0	nan
PAAD	185	10	0.0774	0.143	0.16953
PRAD	503	50	0.1359	0.1113	0.000350019	**
READ	99	7	0.1258	0.0703	0.0494136	*
SKCM	473	2	0.0602	0.0483	0.340113
STAD	395	2	0.0526	0.1226	0.536442
THYM	124	2	0.0467	0.0502	0.954552
THCA	515	56	0.0726	0.1356	0.0636191
UCEC	436	46	0.1007	0.1753	0.278798

## Sheet: supplementary table 4
Supplementary table 4. Prognostic role of CGAS expression in various cancer types in the PrognoScan database.
Dataset	Cancer type	Endpoint	Number	COX P-value	ln(HR)	95% CI (low-high)
GSE13507	Bladder cancer	Overall Survival	165	0.059123	0.46894	1.60 [0.98 - 2.60]
GSE13507	Transitional cell carcinoma	Disease Specific Survival	165	0.0468778	0.606116	1.83 [1.01 - 3.33]
GSE12417-GPL570	AML	Overall Survival	79	0.0786537	0.430526	1.54 [0.95 - 2.49]
GSE12417-GPL570	AML	Overall Survival	79	0.667609	0.186646	1.21 [0.51 - 2.83]
GSE2658	Multiple myeloma	Disease Specific Survival	559	0.772276	0.0398162	1.04 [0.79 - 1.36]
GSE2658	Multiple myeloma	Disease Specific Survival	559	0.407018	0.188375	1.21 [0.77 - 1.88]
GSE7696	Glioblastoma	Overall Survival	70	0.27981	-1.7818	0.17 [0.01 - 4.26]
GSE7696	Glioblastoma	Overall Survival	70	0.913609	0.0710834	1.07 [0.30 - 3.88]
GSE16581	Meningioma	Overall Survival	67	0.925504	0.405214	1.50 [0.00 - 7326.31]
GSE16581	Meningioma	Overall Survival	67	0.115294	1.22716	3.41 [0.74 - 15.71]
GSE19615	Breast cancer	Distant Metastasis Free Survival	115	0.114455	0.660015	1.93 [0.85 - 4.39]
GSE19615	Breast cancer	Distant Metastasis Free Survival	115	0.812632	0.140388	1.15 [0.36 - 3.67]
GSE12276	Breast cancer	Relapse Free Survival	204	0.875472	0.00965753	1.01 [0.89 - 1.14]
GSE12276	Breast cancer	Relapse Free Survival	204	0.209593	0.111711	1.12 [0.94 - 1.33]
GSE6532-GPL570	Breast cancer	Distant Metastasis Free Survival	87	0.92923	-0.106	0.90 [0.09 - 9.33]
GSE6532-GPL570	Breast cancer	Relapse Free Survival	87	0.14528	-0.768815	0.46 [0.16 - 1.30]
GSE6532-GPL570	Breast cancer	Distant Metastasis Free Survival	87	0.14528	-0.768815	0.46 [0.16 - 1.30]
GSE6532-GPL570	Breast cancer	Relapse Free Survival	87	0.92923	-0.106	0.90 [0.09 - 9.33]
GSE9195	Breast cancer	Relapse Free Survival	77	0.382891	-1.70895	0.18 [0.00 - 8.41]
GSE9195	Breast cancer	Relapse Free Survival	77	0.142064	1.37506	3.96 [0.63 - 24.80]
GSE9195	Breast cancer	Distant Metastasis Free Survival	77	0.308281	-2.33036	0.10 [0.00 - 8.61]
GSE9195	Breast cancer	Distant Metastasis Free Survival	77	0.183814	1.43076	4.18 [0.51 - 34.49]
GSE17536	Colorectal cancer	Disease Specific Survival	177	0.233133	-1.39772	0.25 [0.02 - 2.46]
GSE17536	Colorectal cancer	Overall Survival	177	0.859251	0.0391232	1.04 [0.67 - 1.60]
GSE17536	Colorectal cancer	Disease Specific Survival	177	0.8833	0.0372157	1.04 [0.63 - 1.71]
GSE17536	Colorectal cancer	Overall Survival	177	0.0994911	-1.69201	0.18 [0.02 - 1.38]
GSE17536	Colorectal cancer	Disease Free Survival	145	0.68188	-0.129526	0.88 [0.47 - 1.63]
GSE17536	Colorectal cancer	Disease Free Survival	145	0.290751	-1.56398	0.21 [0.01 - 3.81]
GSE14333	Colorectal cancer	Disease Free Survival	226	0.867643	0.0265847	1.03 [0.75 - 1.40]
GSE14333	Colorectal cancer	Disease Free Survival	226	0.300553	0.162589	1.18 [0.86 - 1.60]
GSE17537	Colorectal cancer	Disease Free Survival	55	0.525817	1.20901	3.35 [0.08 - 140.36]
GSE17537	Colorectal cancer	Disease Free Survival	55	0.61326	0.35681	1.43 [0.36 - 5.70]
GSE17537	Colorectal cancer	Disease Specific Survival	49	0.374007	-1.83669	0.16 [0.00 - 9.14]
GSE17537	Colorectal cancer	Disease Specific Survival	49	0.733849	-0.324482	0.72 [0.11 - 4.69]
GSE17537	Colorectal cancer	Overall Survival	55	0.535676	-1.06919	0.34 [0.01 - 10.12]
GSE17537	Colorectal cancer	Overall Survival	55	0.38436	0.572813	1.77 [0.49 - 6.45]
GSE11595	Esophagus Adenocarcinoma	Overall Survival	34	0.171942	1.9382	6.95 [0.43 - 112.08]
GSE22138	Uveal melanoma	Distant Metastasis Free Survival	63	0.080576	-13.737	0.00 [0.00 - 5.32]
GSE22138	Uveal melanoma	Distant Metastasis Free Survival	63	0.0937923	0.409438	1.51 [0.93 - 2.43]
GSE2837	Head and neck Squamous cell carcinoma	Relapse Free Survival	28	0.647961	-0.254638	0.78 [0.26 - 2.31]
GSE2837	Head and neck Squamous cell carcinoma	Relapse Free Survival	28	0.424433	-1.1594	0.31 [0.02 - 5.40]
GSE2837	Head and neck Squamous cell carcinoma	Relapse Free Survival	28	0.740007	0.262259	1.30 [0.28 - 6.12]
GSE13213	Lung Adenocarcinoma	Overall Survival	117	0.557041	0.101644	1.11 [0.79 - 1.55]
GSE31210	Lung Adenocarcinoma	Overall Survival	204	0.108297	-0.288221	0.75 [0.53 - 1.07]
GSE31210	Lung Adenocarcinoma	Overall Survival	204	0.0311502	0.911977	2.49 [1.09 - 5.71]
GSE31210	Lung Adenocarcinoma	Relapse Free Survival	204	0.319848	-0.139739	0.87 [0.66 - 1.15]
GSE31210	Lung Adenocarcinoma	Relapse Free Survival	204	0.000287781	1.1811	3.26 [1.72 - 6.17]
GSE3141	NSCLC	Overall Survival	111	0.726045	-0.0536004	0.95 [0.70 - 1.28]
GSE3141	NSCLC	Overall Survival	111	0.720679	0.0576337	1.06 [0.77 - 1.45]
GSE8894	NSCLC	Relapse Free Survival	138	0.112958	-6.03806	0.00 [0.00 - 4.17]
GSE8894	NSCLC	Relapse Free Survival	138	0.868187	0.0259598	1.03 [0.76 - 1.39]
GSE17710	Lung Squamous cell carcinoma	Relapse Free Survival	56	0.383573	-0.214015	0.81 [0.50 - 1.31]
GSE17710	Lung Squamous cell carcinoma	Overall Survival	56	0.521638	-0.16171	0.85 [0.52 - 1.39]
GSE9891	Ovarian cancer	Overall Survival	278	0.304644	-0.723556	0.49 [0.12 - 1.93]
GSE9891	Ovarian cancer	Overall Survival	278	0.263979	-0.181417	0.83 [0.61 - 1.15]
GSE17260	Ovarian cancer	Overall Survival	110	0.719901	0.0624499	1.06 [0.76 - 1.50]
GSE17260	Ovarian cancer	Progression Free Survival	110	0.437816	-0.109353	0.90 [0.68 - 1.18]
GSE19234	Skin Melanoma	Overall Survival	38	0.649339	0.114585	1.12 [0.68 - 1.84]
GSE19234	Skin Melanoma	Overall Survival	38	0.119929	0.72309	2.06 [0.83 - 5.13]
